# Supplementary material for: Trimeric superoxide dismutase 1 antibody as a universal biomarker for ALS
Source: Research Square preprint supplement (doi:10.21203/rs.3.rs-6941118/v1), 2025-07-15
Supplement: Supplementary file 1 [file 949c9129cda90849bc1d2a74.docx]

**Trimeric superoxide dismutase 1 antibody as a universal biomarker for ALS**

Brianna Hnath1,2, Rachel S. Dokholyan3,4, Zachary Simmons4, and Nikolay V. Dokholyan1,2,5

1Department of Pharmacology, Penn State College of Medicine, Hershey, PA, USA

2Department of Biomedical Engineering, Pennsylvania State University, University Park, PA, USA

3Penn State Health Neuroscience Institute, Hershey, PA, USA

4Department of Neurology, Penn State College of Medicine, Hershey, PA, USA

5Department of Neurology, The University of Virginia, Charlottesville, VA, USA


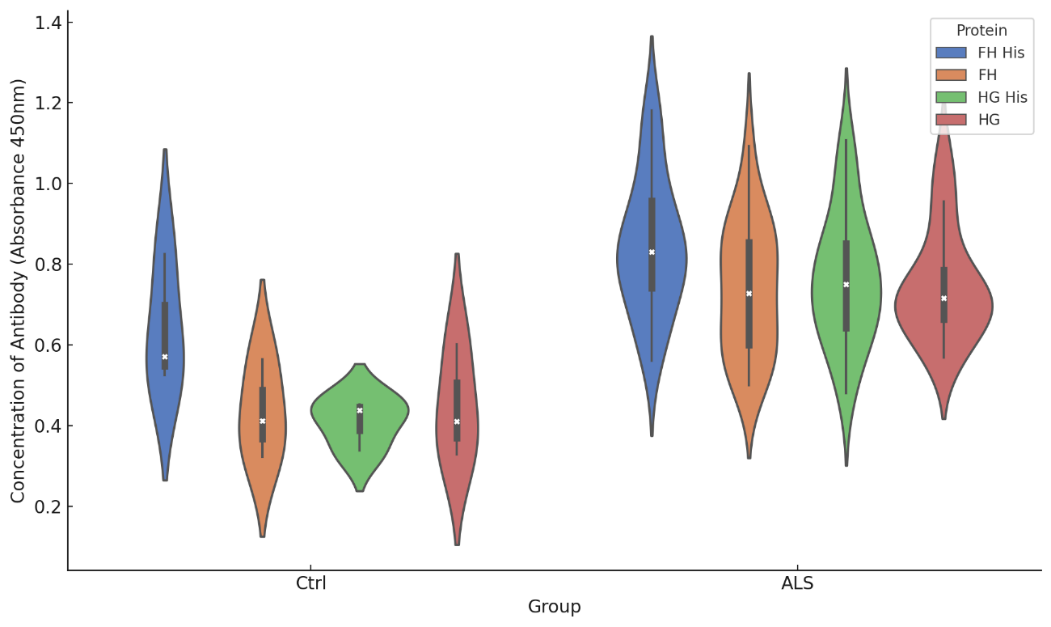


**Figure S1**. The presence of a 6X his tag on the purified protein does not affect the binding of ALS patient antibodies to trimer SOD1. (Ctrl n=3, ALS n=20)


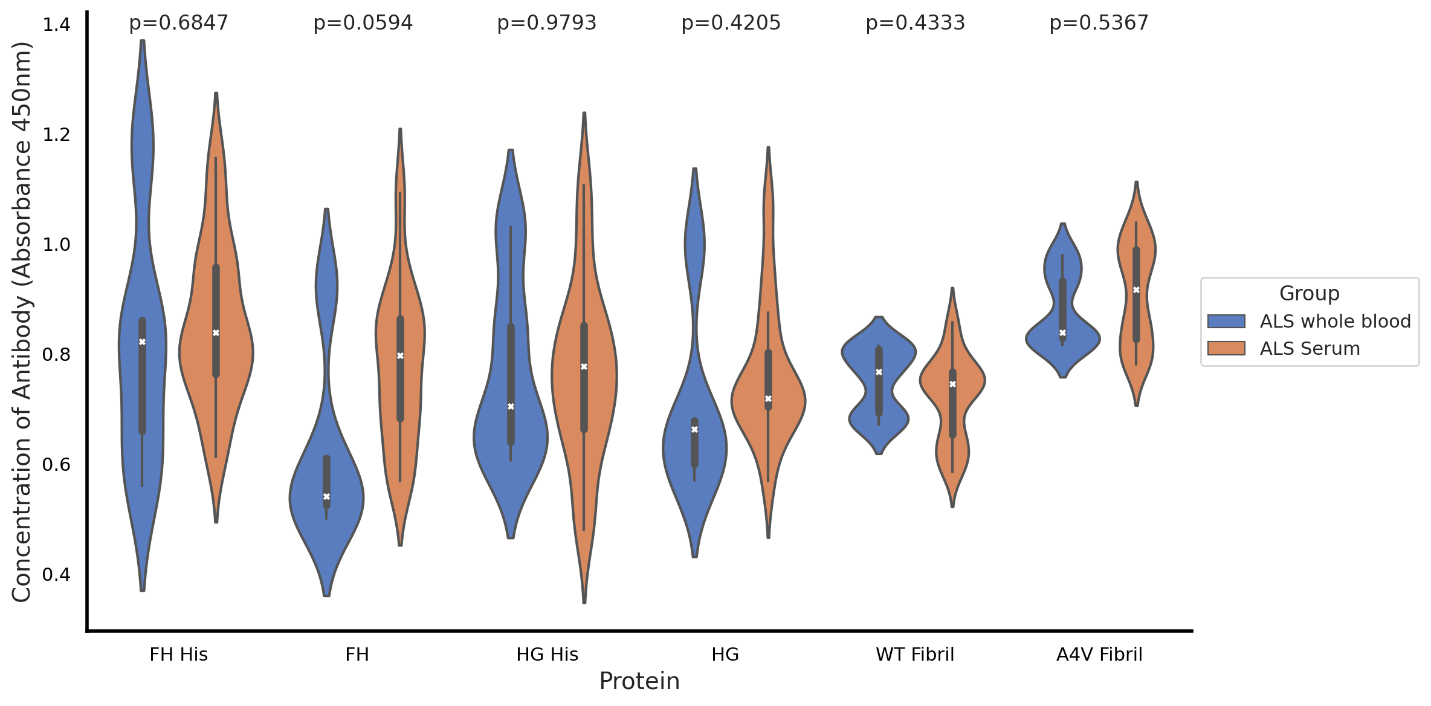


**Figure S2.** There was no significant difference in ALS patient antibody binding to whole blood versus serum (whole blood n=5, serum n=15).


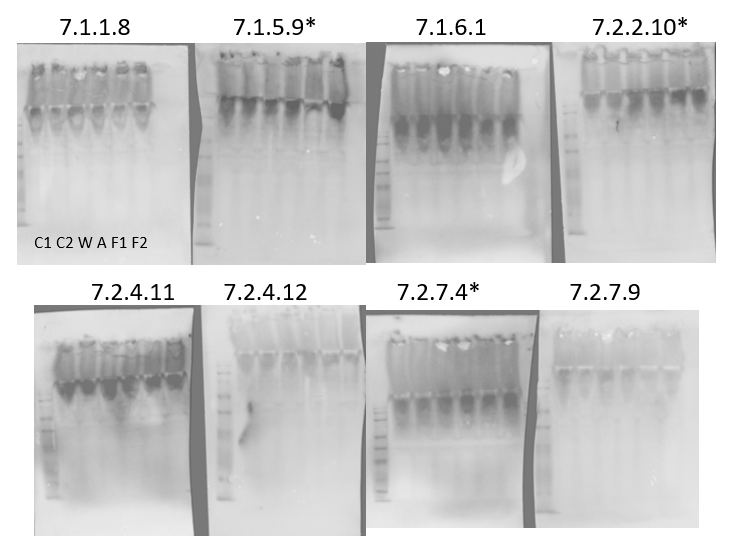


**Figure S3.** Native PAGE of motor neuron-like (NSC-34) cell lysate with no overexpression (C1 & C2), or overexpressing SOD1 WT (W), A4V (A), or F20L-H46Q (F1 & F2). 7.1.5.9, 7.2.2.10, and 7.2.7.4 have an observable increase in antibody signal with trimer stabilization and were selected for further testing.


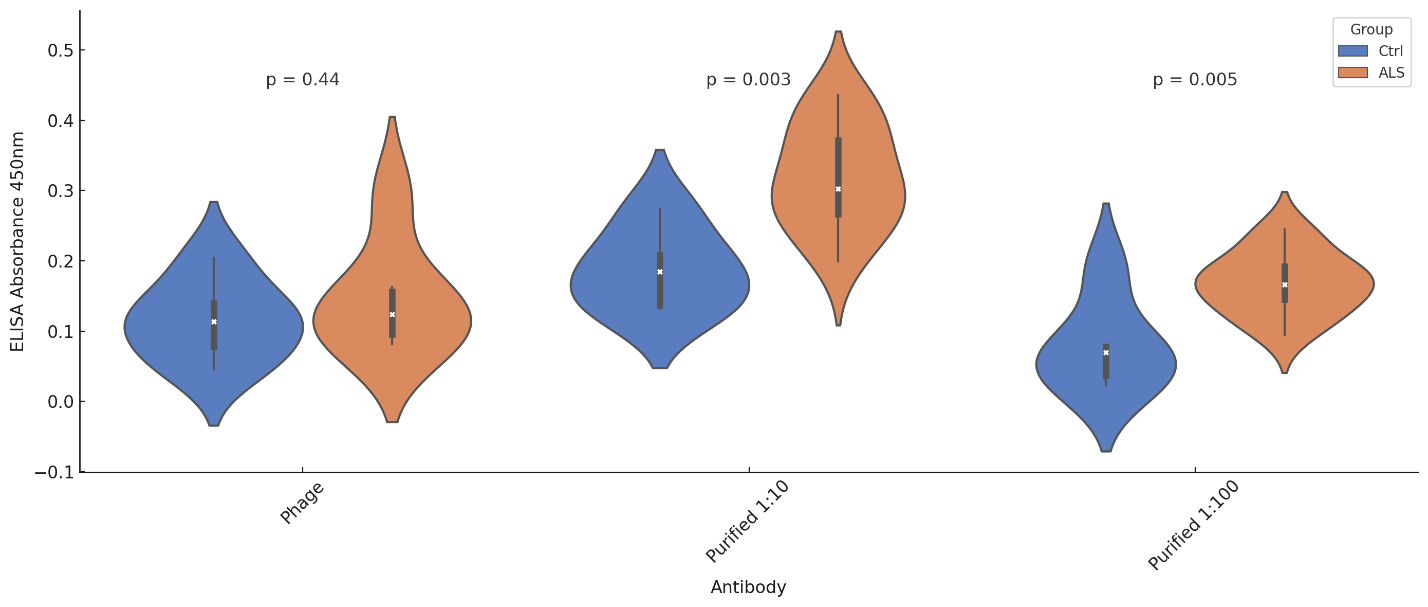


**Figure S4.** Removing the phage portion of the antibody improved non-specific binding allowing a significance difference in signal to be observed between the healthy control and ALS groups (n=5).


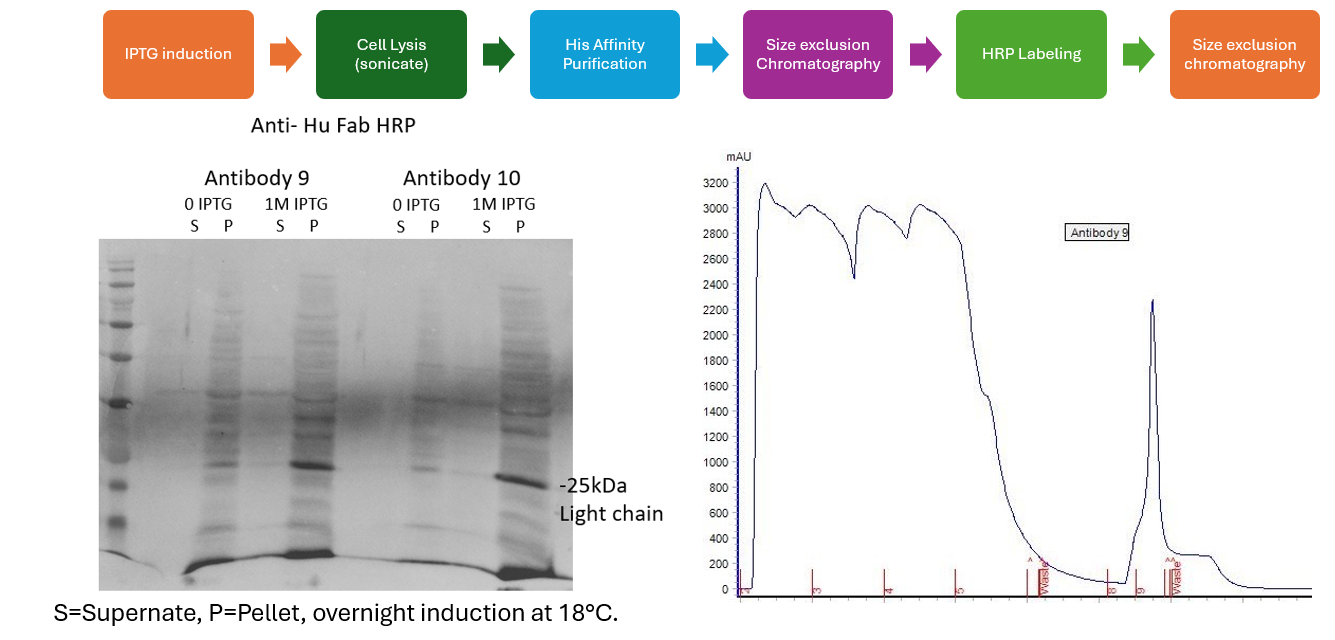


**Figure S5.** Antibody purification process, including the western blot showing the initial IPTG induced expression of the antibody and the chromatograph for the purification of the antibody using a His-tag affinity column (Cytiva HisTrap High Performance column, 5mL).


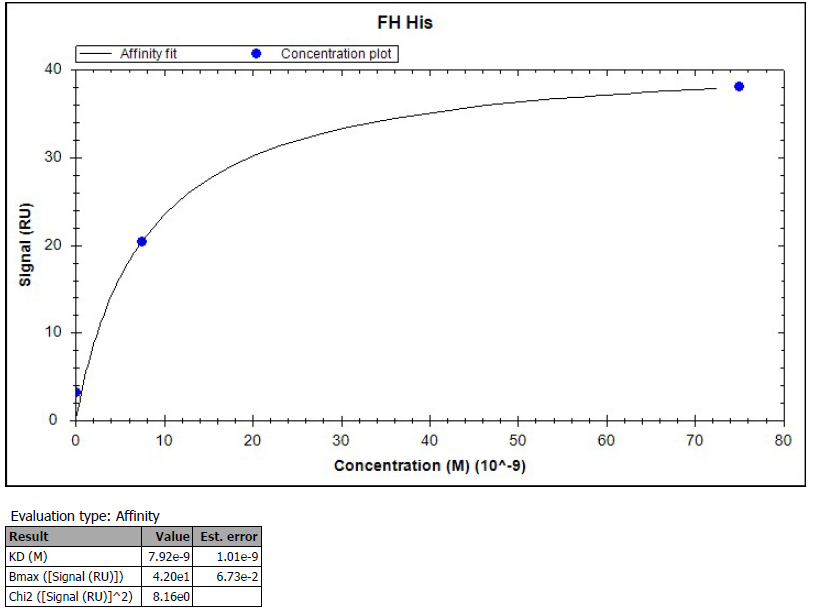


**Figure S6.** Surface plasmon resonance affinity curve for the steady-state binding of trimeric SOD1 FH-His to antibody 9. (57pM, 7.5nM, 75nM)


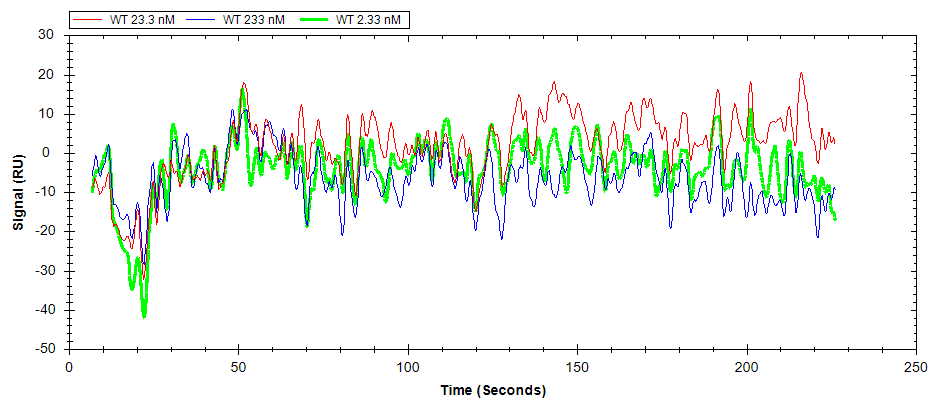


**Figure S7.** Surface plasmon resonance fitted and reference curves for the binding of WT dimeric SOD1 to antibody 9. (green = 2.33nM, red = 23.3nM, blue = 233nM)


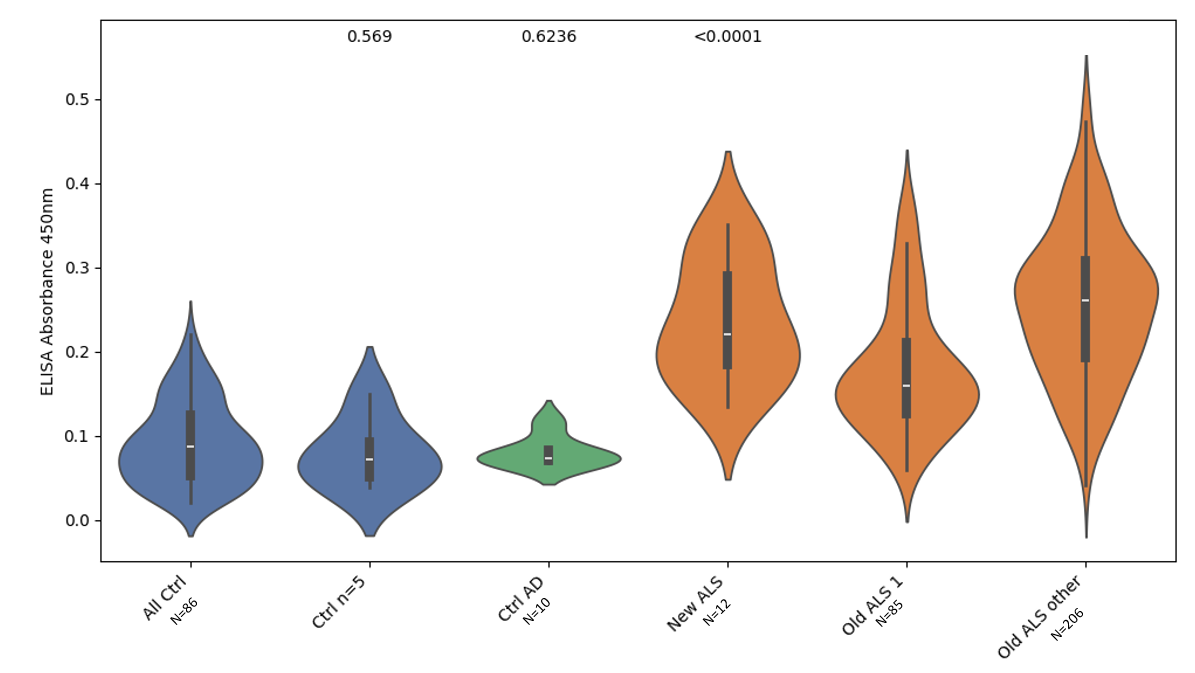


**Figure S8.** Comparison of newly collected ALS patient samples (collected 2024-2025 n=12) to stored older ALS patient samples (collected 2014-2020) both at the patients first visit to the clinic (Old ALS 1, n=85) and at their 2nd-5th visit (Old ALS other, n=206). Healthy control samples were collected within the last year (All Ctrl n=86, Ctrl n=5 is a subset of five of the main group of control samples tested in triplicate).

| Panning Round | Eliminate | Bind |
| --- | --- | --- |
| 1 | WT His Dimer | HG His Trimer |
| 2 | WT His Dimer | FH His Trimer |
| 3 | WT His Dimer, A4V insoluble fibrils | HG His Trimer |
| 4 | WT His Dimer, A4V insoluble fibrils | FH His Trimer |
| 5 | WT His Dimer, A4V insoluble fibrils | HG His Trimer |
| 6 | WT His Dimer, A4V insoluble fibrils | FH His Trimer, HG His Trimer |
| 7 | WT His Dimer, A4V insoluble fibrils | FH His Trimer |

**Table S1.** Panning rounds when isolating possible antibody “hits”.
